# Supplementary material
Source: publisher figshare collection journal article supplement (https://karger.figshare.com/ndownloader/files/10502950)
Supplement: Supplementary file 1 [file 10502950]

**CONDITIONAL LOGISTIC REGRESSION FOR ANALYSIS OF PROPENSITY-MATCHED SUBJECTS**

Below are the output results from the conditional logistic regression from STATA based upon the propensity score matched analysis of subjects in the n = 1695 clinical dataset. The propensity score was calculated using logistic regression with “vasopressor use” as the dependent variable. The independent (predictor) variables used in the model were: Age, sex, initial base deficit, units of blood transfused in first 24 hours, injury severity score, and individual body region AIS severity scores. Only first order variables were used. Subjects were ranked by propensity score and those who received vasopressors in the initial 4 days were matched 1:2 to those who did not based upon the nearest score. The predictor variables that differed statistically in the univariate analyses (Manuscript Table 2) were no longer statistically significantly different after adjusting for the propensity score in this matched group of subjects. This indicates that the score adequately adjusts for baseline differences. These matched groups were then included in the conditional logistic regression models for each outcome that are shown below:

**BACTEREMIA:**

clogit BACT i.vaso_y_n, group(MatchGroup_num) nolog or

note: multiple positive outcomes within groups encountered.

note: 106 groups (318 obs) dropped because of all positive or

all negative outcomes.

Conditional (fixed-effects) logistic regression Number of obs = **258**

LR chi2(1) = 5.45

Prob > chi2 = 0.0196

Log likelihood = -91.756663 Pseudo R2 = 0.0288

------------------------------------------------------------------------------

BACT | Odds Ratio Std. Err. z P>|z| [95% Conf. Interval]

-------------+----------------------------------------------------------------

**1.vaso_y_n | 1.687133 .3767664 2.34 0.019 1.089083 2.613591**

------------------------------------------------------------------------------

**VENTILATOR-ASSOCIATED PNEUMONIA:**

clogit VAP i.vaso_y_n, group(MatchGroup_num) nolog or

note: multiple positive outcomes within groups encountered.

note: 53 groups (159 obs) dropped because of all positive or

all negative outcomes.

Conditional (fixed-effects) logistic regression Number of obs = **417**

LR chi2(1) = 18.73

Prob > chi2 = 0.0000

Log likelihood = -143.34313 Pseudo R2 = 0.0613

------------------------------------------------------------------------------

VAP | Odds Ratio Std. Err. z P>|z| [95% Conf. Interval]

-------------+----------------------------------------------------------------

**1.vaso_y_n | 2.201614 .4098736 4.24 0.000 1.528528 3.171093**

------------------------------------------------------------------------------
